# Supplementary material
Source: ML conference proceedings conference paper supplement (https://proceedings.neurips.cc/paper_files/paper/2023/hash/42b7c2f6d320d1fe1afa899a6319d6d7-Abstract.html)
Supplement: Supplementary file 1 [file 42b7c2f6d320d1fe1afa899a6319d6d7-Supplemental-Conference.pdf]

---

# Neural-Logic Human-Object Interaction Detection

## *Supplementary Materials*

---

Liulei Li<sup>1</sup>, Jianan Wei<sup>2</sup>, Wenguan Wang<sup>2\*</sup>, Yi Yang<sup>2</sup>

<sup>1</sup>ReLER, AAIL, University of Technology Sydney    <sup>2</sup>CCAI, Zhejiang University

<https://github.com/weijianan1/LogicHOI>

This document provides additional materials to supplement our main manuscript. We first summarize extra implementation details of LOGICHOI in §A. Qualitative results as well as analysis on typical failure cases are provided in §B. Finally, we offer further discussion on the limitation and social impact of LOGICHOI in §C.

### A More Implementation Detail

The detection loss used for the output of human decoder (*i.e.*,  $\mathcal{D}^h$ ) and object decoder (*i.e.*,  $\mathcal{D}^o$ ) is implemented in accordance with DETR[1]. Specifically, we compute the object classification loss, and adopt the  $\ell_1$  loss as well as the generalized intersection over union (GIoU) loss for bounding box regression during training. The final prediction of interaction decoder (*i.e.*,  $\mathcal{D}^p$ ) is the category of human-object interaction (*i.e.*,  $\langle \text{human}, \text{action}, \text{object} \rangle$  triplet) rather than a single action since the inputs are three elements to construct the interaction and we aim to not only interpret the complex relation between them, but also refine the object and action predictions. To facilitate the visual knowledge transfer from CLIP[2], we follow previous work[3–8] to adopt the ViT-B/32 variant and freeze its weights during training. Moreover, an auxiliary loss is applied to the intermediate outputs of each decoder layer which contributes to improved results in the decoding process.

### B Qualitative HOI Detection Result

We provide qualitative results of our method, including both success and failure cases in Fig. S2. It can be observed that our method demonstrates remarkable improvements in HOI detection across a wide range of scenarios. The integration of triplet reasoning and logic-guided knowledge learning enables our model to effectively capture intricate relationships between humans and objects, leading to enhanced detection accuracy. Nonetheless, there are certain scenarios where our method encounters challenges. Specifically, in the last column of Figure S2, we observe that our model faces difficulties when dealing with highly ambiguous relations, such as instances where a frisbee is held by a human in a strange pose. The complex spatial arrangement and occlusion make it challenging for the model to accurately infer the correct HOI. Additionally, our model may be inefficient when it needs to deduce additional contextual cues. For example, in cases where a chair is partially occluded by a human, the model may struggle to correctly recognize the interaction between the two entities due to the lack of complete visual information.

### C Discussion

#### C.1 Limitation

It is important to acknowledge a limitation regarding the scale of validation within our study. The number of interactions included in the dataset for model evaluation is limited to fewer than 600

---

\*Corresponding Author: Wenguan Wang.

Table S1: Comparison of efficiency and performance on HICO-DET[9] test and V-COCO[10] test.

| Method                                       | Backbone | Params | FLOPs | FPS   | Default      |              |              | $AP_{role}^{S1}$ | $AP_{role}^{S2}$ |
|----------------------------------------------|----------|--------|-------|-------|--------------|--------------|--------------|------------------|------------------|
|                                              |          |        |       |       | Full         | Rare         | Non-Rare     |                  |                  |
| Two-stages Detectors:                        |          |        |       |       |              |              |              |                  |                  |
| iCAN [11] <sub>[BMVC18]</sub>                | R50      | 39.8   | -     | 5.99  | 14.84        | 10.45        | 16.15        | 45.3             | -                |
| DRG [12] <sub>[ECCV20]</sub>                 | R50-FPN  | 46.1   | -     | 6.05  | 19.26        | 17.74        | 19.71        | 51.0             | -                |
| SCG [13] <sub>[ICCV21]</sub>                 | R50-FPN  | 53.9   | -     | 7.13  | 31.33        | 24.72        | 33.31        | 54.2             | 60.9             |
| STIP [14] <sub>[CVPR22]</sub>                | R50      | 50.4   | -     | 6.78  | 32.22        | 28.15        | 33.43        | <b>65.1</b>      | <b>69.7</b>      |
| One-stages Detectors:                        |          |        |       |       |              |              |              |                  |                  |
| PPDM [15] <sub>[CVPR20]</sub>                | HG104    | 194.9  | -     | 17.14 | 21.73        | 13.78        | 24.10        | -                | -                |
| HOTR [16] <sub>[CVPR21]</sub>                | R50      | 51.2   | 90.78 | 15.18 | 25.10        | 17.34        | 27.42        | 55.2             | 64.4             |
| HOITrans [17] <sub>[CVPR21]</sub>            | R50      | 41.4   | 87.69 | 18.29 | 23.46        | 16.91        | 25.41        | 52.9             | -                |
| AS-Net [18] <sub>[CVPR21]</sub>              | R50      | 52.5   | 87.86 | 17.21 | 28.87        | 24.25        | 33.14        | 53.9             | -                |
| QPIC [19] <sub>[CVPR21]</sub>                | R50      | 41.9   | 88.87 | 16.79 | 29.07        | 21.85        | 31.23        | 58.8             | 61.0             |
| CDN-S [20] <sub>[NeurIPS21]</sub>            | R50      | 42.1   | -     | 15.54 | 31.78        | 27.55        | 33.05        | 62.3             | 64.4             |
| GEN-VLK <sub>s</sub> [8] <sub>[CVPR22]</sub> | R50      | 42.8   | 86.74 | 18.69 | 33.75        | 29.25        | 35.10        | 62.4             | 64.4             |
| LOGICHOI (ours)                              | R50      | 49.8   | 89.65 | 16.84 | <b>35.47</b> | <b>32.03</b> | <b>36.22</b> | 64.4             | 65.6             |

instances. This constrained sample size falls short of capturing the full spectrum of interactions that take place in real-world scenarios. Consequently, the exploration of applications related to object and interaction detection in more complex and diverse situations may be hindered.

## C.2 Broader Impact

This work provides a feasible way to interpret complex relationships between human beings and objects, and can thus benefit a variety of applications, including but not limited to robotics, health care, and autonomous driving, *etc.* Nevertheless, there is a risk that LOGICHOI would be used inappropriately, for instance, the constant monitoring and detection of human-object interactions may raise concerns about intrusive surveillance and the collection of personal data without consent. Therefore, it is imperative to duly consider ethical requirements and legal compliance when addressing the apprehensions regarding individual privacy. Meanwhile, in order to prevent potential negative social effects, it is crucial to develop robust security protocols and systems that effectively safeguard sensitive information, eliminating the risk of cyber attacks and data breaches.

## D License

The V-COCO[10] and HICO-DET[9] datasets are released under the MIT license and the CC0: Public Domain license, respectively. We employ them for the purpose of research.

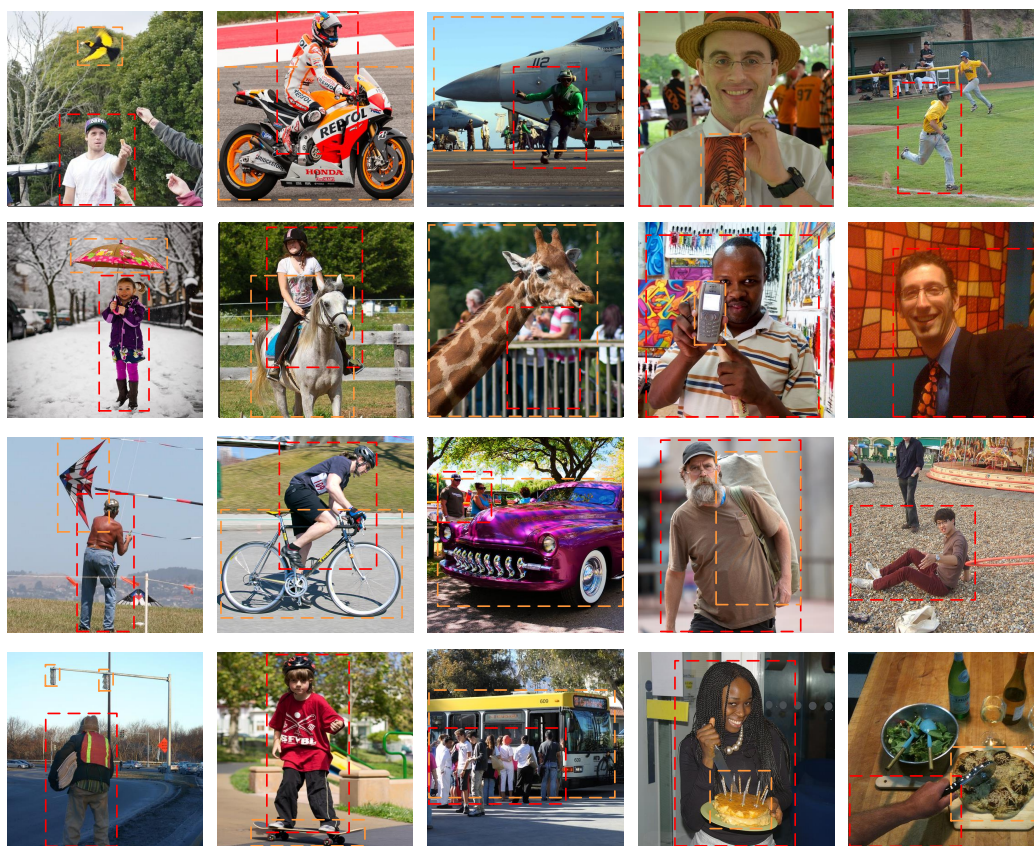

(a) above

(b) below

(c) around

(d) within

(f) containing

Figure S1: Examples of the five spatial relations from V-COCO[10] and HICO-DET[9].

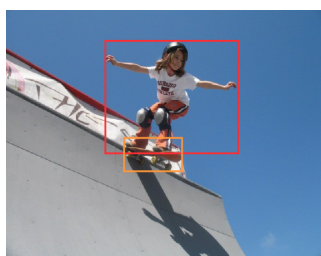

person skateboard skateboard  
person jump skateboard

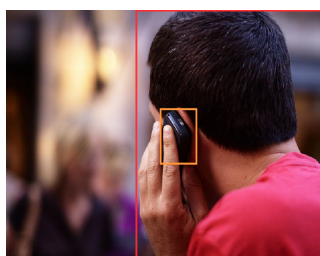

person talk on cell phone  
person hold cell phone

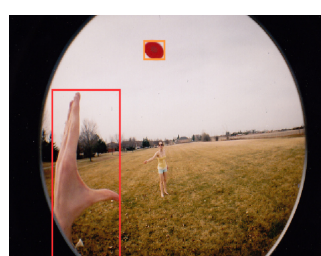

person catch frisbee

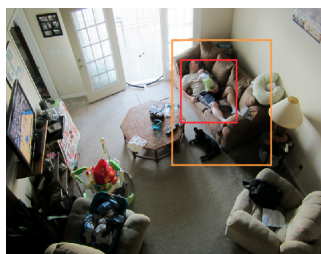

person lay couch

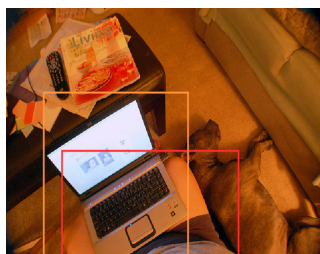

person work on computer

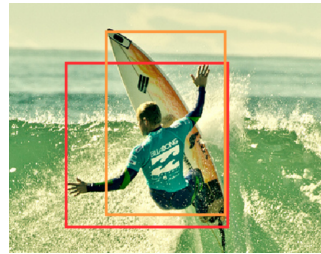

person look at surfboard  
person surf surfboard

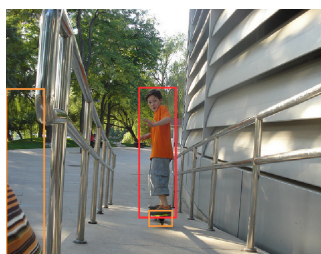

person skateboard skateboard  
person stand

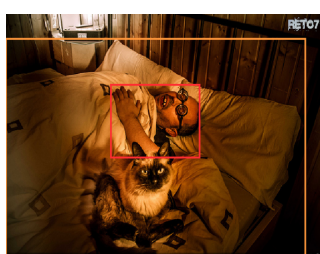

person lay bed

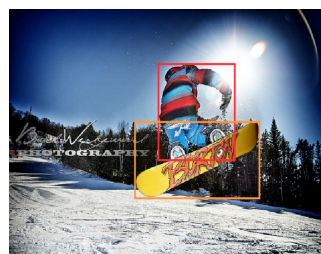

person jump snowboard  
person snowboard snowboard

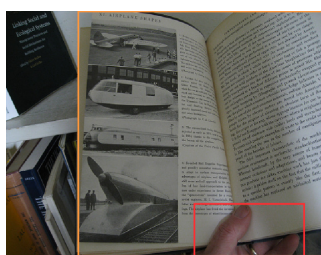

person hold book  
person read book

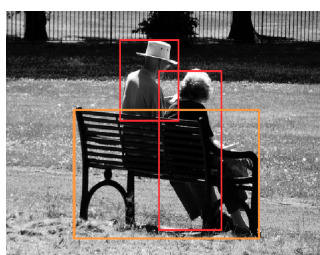

person sit bench  
person sit bench

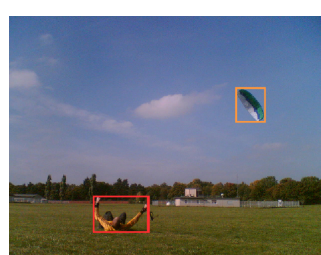

person look at kite

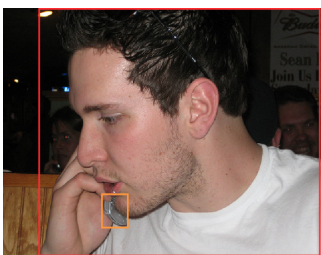

nothing  
person sit

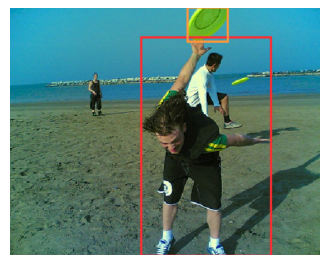

person catch-frisbee  
person throw frisbee

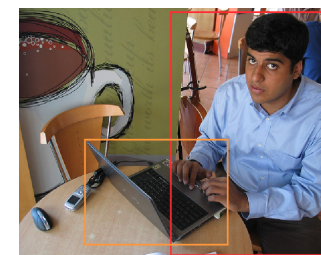

person look-at-laptop  
person sit chair

Figure S2: Successful and failure cases selected from V-COCO[10] and HICO-DET[9].

## References

- [1] Nicolas Carion, Francisco Massa, Gabriel Synnaeve, Nicolas Usunier, Alexander Kirillov, and Sergey Zagoruyko. End-to-end object detection with transformers. In *ECCV*, 2020.
- [2] Alec Radford, Jong Wook Kim, Chris Hallacy, Aditya Ramesh, Gabriel Goh, Sandhini Agarwal, Girish Sastry, Amanda Askell, Pamela Mishkin, Jack Clark, et al. Learning transferable visual models from natural language supervision. In *ICML*, 2021.
- [3] ASM Iftekhar, Hao Chen, Kaustav Kundu, Xinyu Li, Joseph Tighe, and Davide Modolo. What to look at and where: Semantic and spatial refined transformer for detecting human-object interactions. In *CVPR*, 2022.
- [4] Hangjie Yuan, Jianwen Jiang, Samuel Albanie, Tao Feng, Ziyuan Huang, Dong Ni, and Mingqian Tang. Rlip: Relational language-image pre-training for human-object interaction detection. In *NeurIPS*, 2022.
- [5] Suchen Wang, Yueqi Duan, Henghui Ding, Yap-Peng Tan, Kim-Hui Yap, and Junsong Yuan. Learning transferable human-object interaction detector with natural language supervision. In *CVPR*, 2022.
- [6] Xian Qu, Changxing Ding, Xingao Li, Xubin Zhong, and Dacheng Tao. Distillation using oracle queries for transformer-based human-object interaction detection. In *CVPR*, 2022.
- [7] Leizhen Dong, Zhimin Li, Kunlun Xu, Zhijun Zhang, Luxin Yan, Sheng Zhong, and Xu Zou. Category-aware transformer network for better human-object interaction detection. In *CVPR*, 2022.
- [8] Yue Liao, Aixi Zhang, Miao Lu, Yongliang Wang, Xiaobo Li, and Si Liu. Gen-vlkt: Simplify association and enhance interaction understanding for hoi detection. In *CVPR*, 2022.
- [9] Yu-Wei Chao, Yunfan Liu, Xieyang Liu, Huayi Zeng, and Jia Deng. Learning to detect human-object interactions. In *WACV*, 2018.
- [10] Saurabh Gupta and Jitendra Malik. Visual semantic role labeling. *arXiv preprint arXiv:1505.04474*, 2015.
- [11] Chen Gao, Yuliang Zou, and Jia-Bin Huang. ican: Instance-centric attention network for human-object interaction detection. In *BMVC*, 2018.
- [12] Chen Gao, Jiarui Xu, Yuliang Zou, and Jia-Bin Huang. Drg: Dual relation graph for human-object interaction detection. In *ECCV*, 2020.
- [13] Frederic Z Zhang, Dylan Campbell, and Stephen Gould. Spatially conditioned graphs for detecting human-object interactions. In *ICCV*, 2021.
- [14] Yong Zhang, Yingwei Pan, Ting Yao, Rui Huang, Tao Mei, and Chang-Wen Chen. Exploring structure-aware transformer over interaction proposals for human-object interaction detection. In *CVPR*, 2022.
- [15] Yue Liao, Si Liu, Fei Wang, Yanjie Chen, Chen Qian, and Jiashi Feng. Ppdm: Parallel point detection and matching for real-time human-object interaction detection. In *CVPR*, 2020.
- [16] Bumsu Kim, Junhyun Lee, Jaewoo Kang, Eun-Sol Kim, and Hyunwoo J Kim. Hotr: End-to-end human-object interaction detection with transformers. In *CVPR*, 2021.
- [17] Cheng Zou, Bohan Wang, Yue Hu, Junqi Liu, Qian Wu, Yu Zhao, Boxun Li, Chenguang Zhang, Chi Zhang, Yichen Wei, et al. End-to-end human object interaction detection with hoi transformer. In *CVPR*, 2021.
- [18] Mingfei Chen, Yue Liao, Si Liu, Zhiyuan Chen, Fei Wang, and Chen Qian. Reformulating hoi detection as adaptive set prediction. In *CVPR*, 2021.
- [19] Masato Tamura, Hiroki Ohashi, and Tomoaki Yoshinaga. Qpic: Query-based pairwise human-object interaction detection with image-wide contextual information. In *CVPR*, 2021.
- [20] Aixi Zhang, Yue Liao, Si Liu, Miao Lu, Yongliang Wang, Chen Gao, and Xiaobo Li. Mining the benefits of two-stage and one-stage hoi detection. In *NeurIPS*, 2021.
